# Supplementary material
Source: PubMed Central journal article supplement (PMC8087203)
Supplement: jci-131-141676-s039.pdf [file jci-131-141676-s039.pdf]

## Supplemental Figures

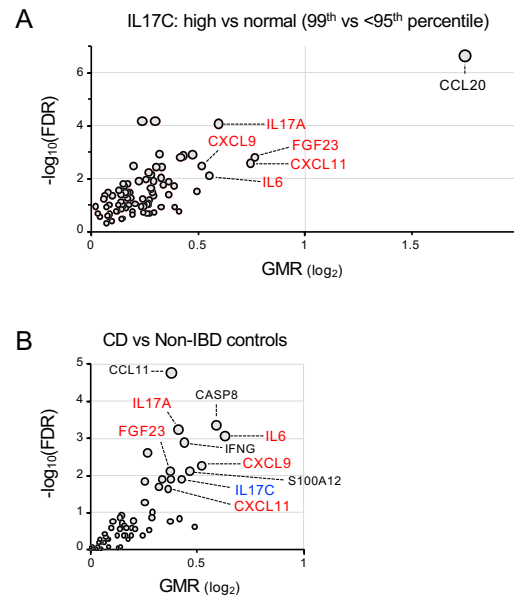

**Supplemental Figure 1: Plasma protein profile in IL17C<sup>high</sup> subjects. (A)** The plasma level of 91 inflammation-related proteins was compared between subjects with outlier high plasma IL17C level (IL17C<sup>high</sup>: 99<sup>th</sup> percentile for IL17C;  $n = 27$ ) and those with normal/low plasma IL17C (< 95<sup>th</sup> percentile for IL17C;  $n = 2580$ ). The volcano plot shows the geometric mean ratio (GMR; 99<sup>th</sup> vs < 95<sup>th</sup> percentile for IL17C) on the x-axis and the significance level (FDR; 2-tailed Mann-Whitney test with Benjamini-Hochberg correction) on the y-axis. The GMR( $\log_2$ ) for IL17C was 2.28 (not shown). Note that only one of the IL17C<sup>high</sup> subjects had (self-reported) IBD; exclusion of data for this subject did not meaningfully change the overall protein profile. **(B)** Analysis of the plasma protein profile in CD patients and non-IBD controls. Protein level data were obtained from a study by Andersson et al. (27). The volcano plot depicts the geometric mean ratios (CD vs non-IBD controls;  $\log_2$ ) on the x-axis and the corresponding FDR values on the y-axis.

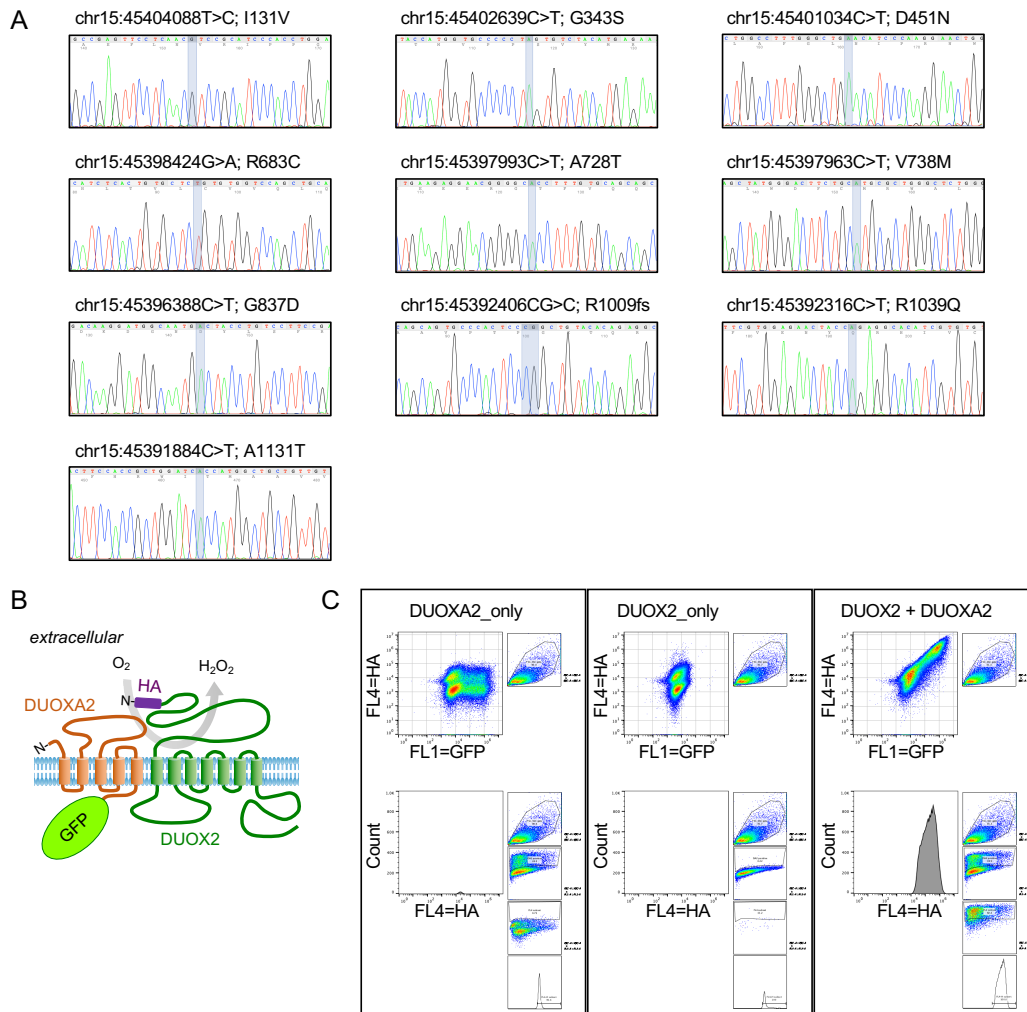

**Supplemental Figure 2: In vitro function of selected protein-altering *DUOX2* variants. (A)** Sequencing electropherograms confirming mutations introduced in a reference sequence *DUOX2* expression plasmid. **(B)** Topology model of the *DUOX2*/*DUOX2* enzyme complex depicting the *DUOX2*-EGFP fusion and HA-epitope tag of *DUOX2* used in the flow cytometry assay. **(C)** Quantitation of *DUOX2* cell-surface expression in non-permeabilized cells. Expression at the cell surface (AUC of the HA signal) is normalized for the number of transfected (i.e., GFP positive) cells.

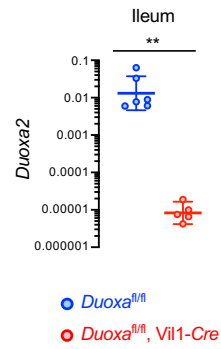

**Supplemental Figure 3: Expression of *Duoxa2* in the ileum of intestinal epithelial-specific *Duoxa* KO mice.** Data represent geometric means with 95% CI of *Duoxa2* mRNA expression in the terminal ileum of intestinal epithelial-specific *Duoxa* KO ( $n = 5$ ) and floxed littermate control mice ( $n = 6$ ). \*\*,  $P < 0.01$ ; 2-tailed Mann-Whitney.

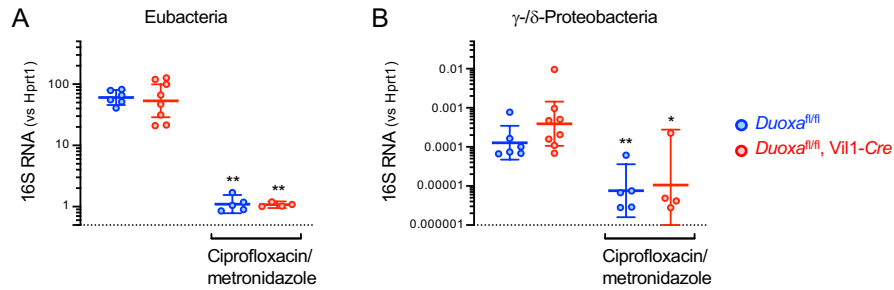

**Supplemental Figure 4: Effect of antibiotics treatment on mucosal microbiota.** Mice were treated for 3 days with a combination of ciprofloxacin and metronidazole (50 mg/kg BW, twice daily by oral gavage). To confirm the effect on the level of live, mucosa-associated microbiota, bacterial 16S rRNA level was determined in mucosal samples from the terminal ileum. Bacterial rRNA levels are normalized to the level of the mouse *Hprt1* housekeeping gene. **(A)** Amplification with universal eubacterial primers. **(B)** Amplification with primers specific for  $\gamma$ - and  $\delta$ -*Proteobacteria*.  $n = 6$  and  $5$  for control mice without or with antibiotics treatment, respectively, and  $n = 8$  and  $4$  for intestinal epithelial-specific *Duoxa* KO mice without or with antibiotics treatment, respectively. Data represent geometric means with 95% CI. \*,  $P < 0.05$ ; \*\*,  $P < 0.01$ ; 2-tailed Mann-Whitney (vs untreated).

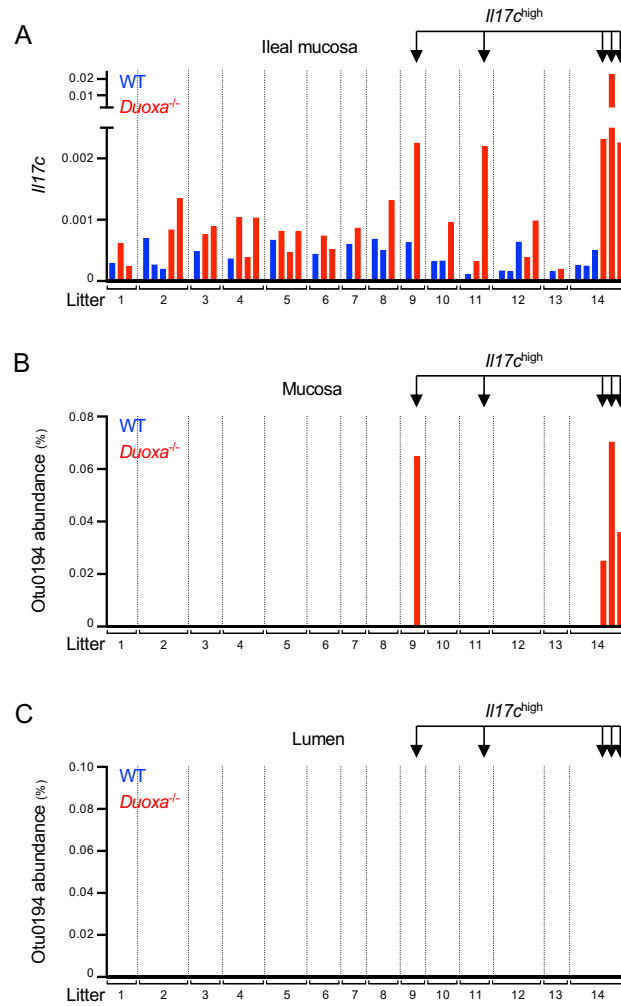

**Supplemental Figure 5: *Proteobacteria* otu0194 is detected in the mucosal niche of *Il17c*<sup>high</sup> samples.** (A) Ileal *Il17c* expression in WT ( $n = 22$ ) and *Duoxa*<sup>-/-</sup> ( $n = 26$ ) mice derived from 14 distinct breeding pairs (parental genotypes: *Duoxa*<sup>+/-</sup>). For each litter, mice were separated by genotype at weaning (P21). Five KO mice had outlier high *Il17c* expression (arrows). (B) The relative abundance of otu0194 in ileal mucosal samples. (C) The relative abundance of otu0194 in corresponding luminal content of ileal samples.

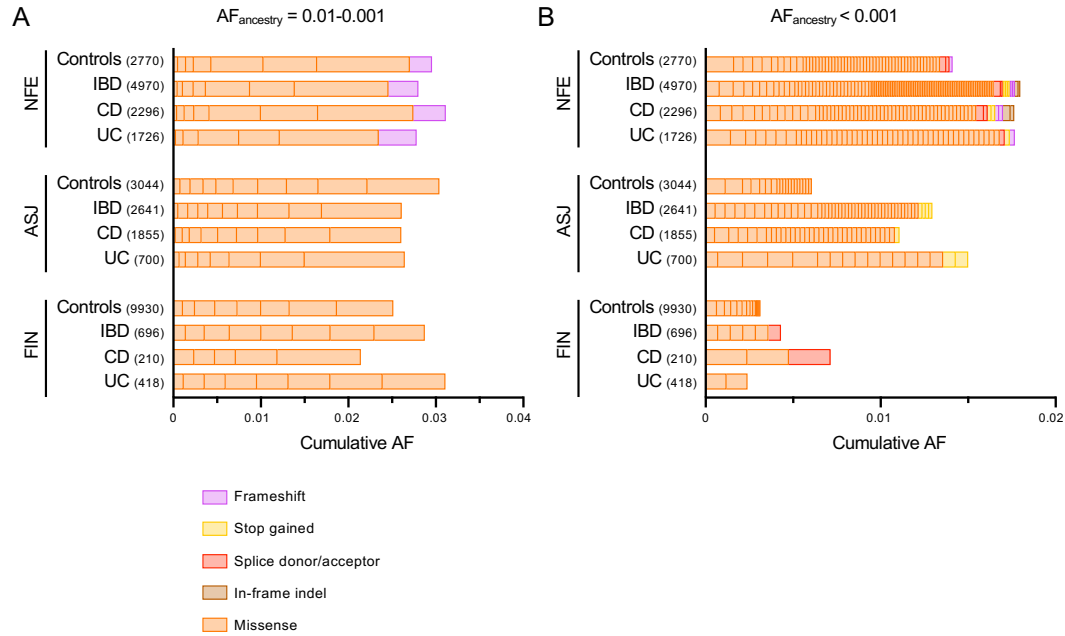

**Supplemental Figure 6: Frequency distribution of rare and very rare *DUOX2* protein-altering variants in IBD and control cohorts. (A-B)** Frequency distribution of *DUOX2* protein-altering variants identified in whole-genome sequencing data of IBD patients and non-IBD controls (IBD Exomes Portal). Variants were stratified by minor allele frequency using data for the corresponding ancestry group in gnomAD ( $AF_{ancestry}$ , i.e., gnomAD\_NFE\_AF, gnomAD\_ASJ\_AF, or gnomAD\_FIN\_AF).
